# Supplementary material for: Influence of aluminum microparticles on plasma chemistry and structural dynamics of ns-laser ablated 5-methyl-1H-tetrazole in argon atmosphere
Source: Royal Society of Chemistry journal article supplement (doi:10.1039/d2ja00210h), 2022-01-01
Supplement: d2ja00210h1.pdf [file d2ja00210h1.pdf]

## Supporting Information

### Influence of aluminum microparticles on plasma chemistry and structural dynamics of ns-laser ablated 5-methyl-1H-tetrazole in argon atmosphere

K. Deng<sup>a</sup>, S. W. Li,<sup>b</sup> Y. L. Zhao,<sup>\*a</sup> J. C. Shi<sup>\*c</sup>, and S. N. Luo<sup>a</sup>

<sup>a</sup>School of Materials Science and Engineering, Southwest Jiaotong University, Chengdu, Sichuan, People's Republic of China. <sup>b</sup>School of Physical Science and Technology, Southwest Jiaotong University, Chengdu, Sichuan, People's Republic of China. <sup>c</sup>The Peac Institute of Multiscale Sciences, Chengdu, Sichuan, People's Republic of China. E-mail: [ylzhao@pims.ac.cn](mailto:ylzhao@pims.ac.cn); [jcshi@pims.ac.cn](mailto:jcshi@pims.ac.cn).

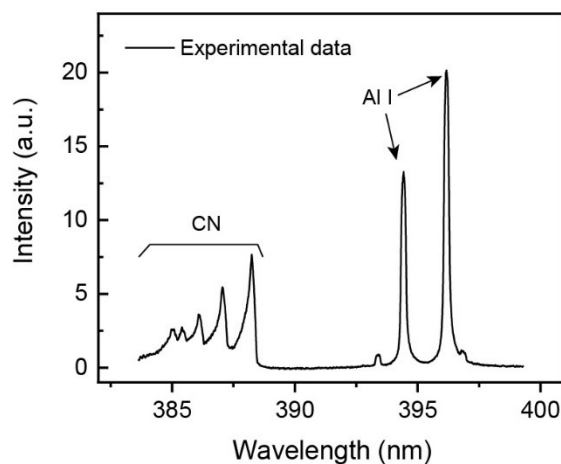

Figure S1. The entire spectral regions covered by the bandpass filter centered at 390 nm.

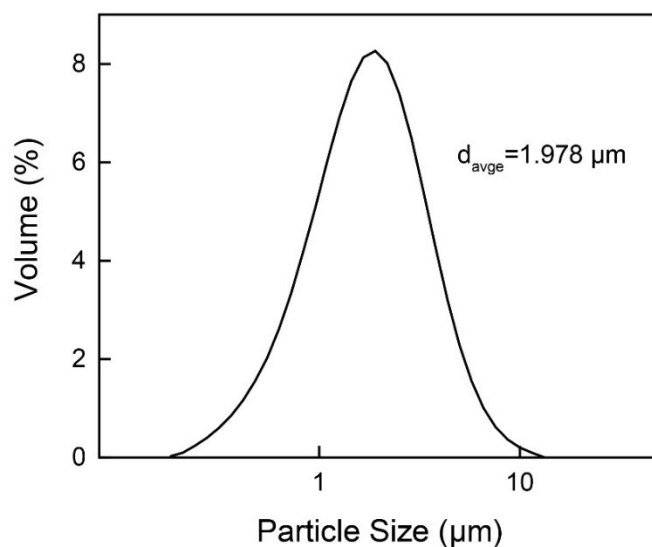

Figure S2. The particle size distribution of the Al microparticles.

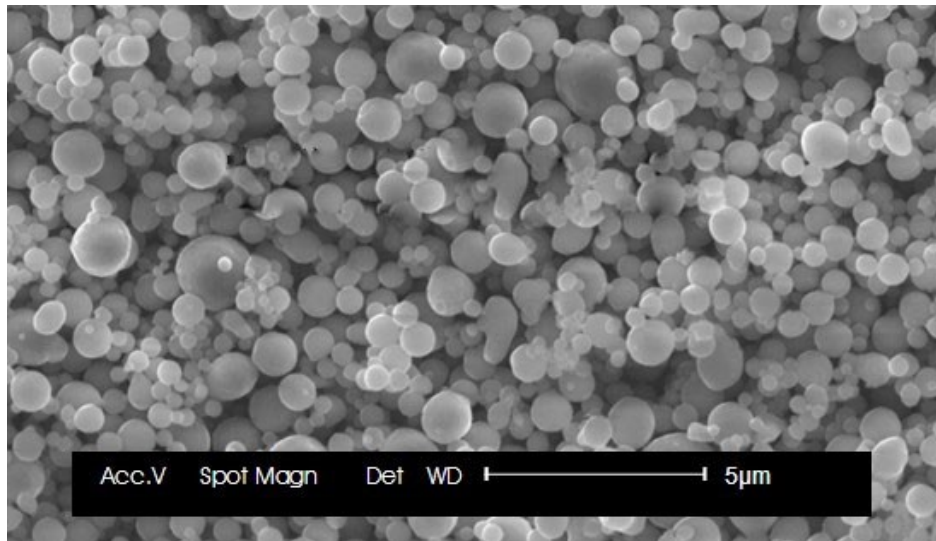

Figure S3. Scanning electron microscope image of the Al microparticles.
